# Supplementary material for: Transfer printing of perovskite nanocrystal self-assembled monolayers via controlled surface wettability
Source: Royal Society of Chemistry journal article supplement (doi:10.1039/d4nr05088f), 2025-01-01
Supplement: d4nr05088f1.pdf [file d4nr05088f1.pdf]

Supporting Information for

# Transfer Printing of Perovskite Nanocrystal Self-Assembled Monolayers via Controlled Surface Wettability

Yuto Kajino\*, Yuta Tanaka, Yukiko Aida, Yusuke Arima, Kaoru Tamada\*

Institute for Materials Chemistry and Engineering (IMCE), Kyushu University, 744 Motooka, Fukuoka 819-0395, Japan

## Corresponding Author

\*kajino@ms.ifoc.kyushu-u.ac.jp

\*tamada@ms.ifoc.kyushu-u.ac.jp

## 1. Unsuccessful film transfer printing

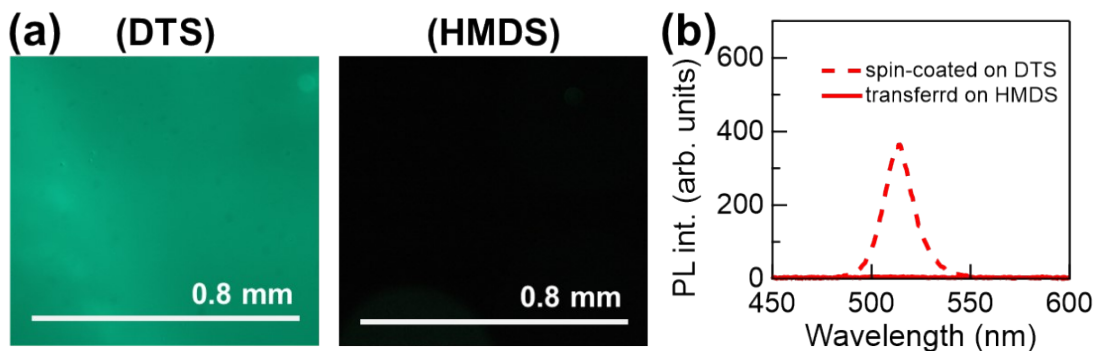

**Figure S1.** (a) Fluorescence microscope images of spin-coated LHP NC monolayers on a DTS-treated substrate and after an attempted transfer onto an HMDS-treated substrate. (b) PL spectra of NC monolayers measured on these substrates (Broken curve: DTS-treated substrate; solid curve: after attempted transfer onto HMDS-treated substrate). No green emission was observed on the HMDS-treated substrate in both the image and spectrum, suggesting that transfer did not occur, which is consistent with our predictions based on the work of adhesion calculations shown in **Fig. 2d**.
